1 **Identification and expression of *Lactobacillus paracasei* genes for adaptation to**  
2 **desiccation and rehydration**

3 **Aurore Palud<sup>a#</sup>, Karima Salem<sup>a,b</sup>, Jean-François Cavin<sup>a</sup>, Laurent Beney<sup>a</sup> and Hélène**  
4 **Licandro<sup>a#</sup>**

5 <sup>a</sup>Université de Bourgogne Franche-Comté, AgroSup Dijon, PAM UMR A 02.102, Dijon,  
6 France

7 <sup>a</sup> Ecole polytechnique de Sousse, Sousse, Tunisia

8 Running title: *Lactobacillus* desiccation genes

9 # Address correspondence to Aurore Palud, [palud.aurore@gmail.com](mailto:palud.aurore@gmail.com) and Hélène Licandro,  
10 [helene.licandro@u-bourgogne.fr](mailto:helene.licandro@u-bourgogne.fr)

11

12 **Abstract**

13 *Lactobacillus paracasei* is able to persist in a variety of natural and technological  
14 environments despite physico-chemical perturbations, in particular alternations between  
15 desiccation and rehydration. However, the way in which it adapts to hydric fluctuations and  
16 in particular the genetic determinants involved are not clearly understood. To identify the  
17 genes involved in adaptation to desiccation, an annotated library of *L. paracasei* random  
18 transposon mutants was screened for viability after desiccation (25% relative humidity,  
19 25°C). Subsequently, the expression of the identified genes was measured at five stages of the  
20 dehydration-rehydration process to formulate the chronology of gene expression. The 24  
21 identified genes were related to metabolism and transport, membrane function and structure,  
22 regulation of stress response, DNA related enzymes and environmental sensing. They were

23 classified into four different transcriptomic profiles, in particular genes upregulated during  
24 both desiccation and rehydration phases and genes upregulated during the desiccation phase  
25 only. Thus, genetic response to hydric fluctuations seems to occur during desiccation and can  
26 continue or not during rehydration. The genes identified should contribute to improving the  
27 stabilization of lactobacillus starters in dry state.

28

## 29 **Importance**

30 Since water is the fundamental component of all living organisms, desiccation and  
31 rehydration alternation is one of the most prevalent and severe stresses for most  
32 microorganisms. Adaptation to this stress occurs via a combination of mechanisms which  
33 depend on the genetic background of the microorganism. In *L. paracasei*, we developed a  
34 strategy to identify genes involved in the adaptation to hydric fluctuations using random  
35 transposon mutagenesis and targeted transcriptomics. Both dehydration and rehydration were  
36 studied to decipher the chronology of genetic mechanisms. We found 24 as yet unidentified  
37 genes involved in this response. Most of them are linked to either the transport of molecules  
38 or to cell wall structure and function. Our screening also identified genes for environment  
39 sensing and two alarmones necessary for *L. paracasei* survival. Furthermore, our results show  
40 that desiccation is a critical phase for inducing stress response in *L. paracasei*.

41

42 **Keywords** *Lactobacillus paracasei*, transposon mutants, desiccation, rehydration, gene  
43 expression

44

45

46

## 47 **Introduction**

48 Water is essential for all living organisms as it contributes to the structure of cells, stabilizes  
49 proteins, lipids and nucleic acids, and maintains vital metabolic systems and chemical  
50 reactions (1). Desiccation leads to water exit from cells, induces structural modifications, and  
51 causes osmotic and oxidative stresses (1–3). In addition, the rehydration phase could lead to  
52 membrane alterations (4). The capacity to return to life after hydric fluctuations is not only  
53 crucial for bacteria as a function of diurnal and seasonal cycles in natural environments but  
54 also during food industry processes such as conventional drying, freeze drying and spray  
55 drying (1, 5–7). In many organisms, desiccation survival is correlated with the accumulation  
56 of protective molecules, in particular trehalose (8). However, desiccation tolerance involves  
57 other mechanisms that are mostly unknown except for extreme desiccation tolerant bacteria  
58 (anhydrobiotes) such as cyanobacteria (9), yeast (2), resurrection plants (10) and  
59 microscopic animals (11).

60 In the last few years, progress has been made in understanding the mechanisms of bacteria  
61 tolerance to partial desiccation using transcriptome analysis, in particular for *Salmonella*, one  
62 of the most common foodborne pathogens able to survive for extended periods after  
63 desiccation (12–17). The comparison of these studies has revealed differences in identified  
64 genes that could be explained by the procedures used to dry bacteria (surface, drying medium,  
65 RH, desiccation periods). Several common genes were linked to amino acid transport and  
66 metabolism functions. Global transcriptional analyses were also performed for soil-residing  
67 bacteria (18–20) and similar responses were identified such as compatible solute and heat  
68 shock protein accumulation, reactive oxygen species neutralization, and DNA modification  
69 and repair. However, transcriptomics has limitations since genes essential for a function can  
70 be constitutively expressed and even inducible genes can be overexpressed during a very short  
71 period that does not overlap with that of the experiment. Recently, random transposon

72 mutagenesis approaches were developed to identify genes for resistance to desiccation in  
73 *Listeria monocytogenes* (Hingston et al., 2015) and *Salmonella enterica* (22). For *L.*  
74 *monocytogenes* screening, genes were involved in energy production, membrane transport,  
75 amino acid metabolism, fatty acid metabolism and oxidative damage control. In *S. enterica*, in  
76 comparison to previous transcriptomic studies, several genes were related to amino acid  
77 metabolism and more than 20% encoded hypothetical proteins. Recently, changes in  
78 proteomic expression were investigated for *S. enterica* during desiccation and rehydration  
79 (23). The proteins with higher expression levels in dried samples were mainly ribosomal  
80 proteins whereas flagellar proteins, membrane proteins, and export systems as well as stress  
81 response proteins were identified in rehydrated samples.

82 Although *L. casei/paracasei* is one of the most emblematic groups of lactic acid bacteria  
83 (LAB), the genetic mechanisms involved in desiccation resistance and adaptation are not fully  
84 understood, limiting prospects for improving and developing preservation processes.  
85 Comparative genomics has demonstrated that LAB are highly adaptable to various niches  
86 such as soil, foods (dairy, meat, and vegetable), as well as oral, vaginal and gastrointestinal  
87 cavities (24–26). This is correlated with an ability to adapt and persist under diverse  
88 environmental stresses (27). Thanks to this capacity, humans have succeeded in selecting and  
89 producing certain LAB strains as efficient starters for fermented foods (particularly hard  
90 cheese) and as probiotics. The adequate preservation of starter cultures is necessary though it  
91 is currently only possible using advanced desiccation technologies and storage in frozen state  
92 (28)

93 Considering the importance of the *L. casei/paracasei* group for health and industrial  
94 applications, we compiled a non-redundant, annotated transposon mutant library of *L.*  
95 *paracasei* (29, 30) based on the P<sub>junc</sub>-TpaseIS<sub>1223</sub> system, a random mutagenesis tool  
96 specifically designed for the *Lactobacillus* genus (31). Recently, using this approach we

97 determined five *Lactobacillus pentosus* mutants sensitive to olive brine due to multifactorial  
98 stress (32). In addition, new genetic determinants were identified during the early stage of *L.*  
99 *paracasei* establishment in the gut (29) and during monofactorial perturbations of mild  
100 intensities (33). In the present work, the *L. paracasei* transposon mutant library was screened  
101 to identify genes involved in the adaptation of this LAB to desiccation and rehydration. The  
102 expression of corresponding genes was studied by RT-qPCR during the two-step process to  
103 draw a chronological transcriptomic profile during hydric fluctuations.

104

## 105 **Results**

### 106 **Development of the screening strategy**

107 A library containing a total number of 1287 *L. paracasei* mutants was screened for their  
108 capacity to resist a 24-h desiccation period followed by rapid rehydration in comparison with  
109 their parental strain (*L. paracasei* ATCC 334, named WT). Convective drying in a ventilated  
110 chamber at room temperature with a relative humidity (RH) of 25% was selected to mimic the  
111 severe desiccation conditions that can occur in natural environments during drought in soil, on  
112 plants, and on animal skin, for example. This process consisted in passing a flow of dry air  
113 over the cell suspension approximately simulating the desiccation conditions that organisms  
114 can undergo in the natural environment. To assess the importance of sugars as drying  
115 protectors, we selected three disaccharides related in the literature to lactic acid bacteria  
116 preservation, in particular during freeze drying (34–36), and their corresponding  
117 monosaccharides. The viability of *L. paracasei* WT after 24-h desiccation at 25% RH was  
118 determined with and without the protectors (Table 1). Viability was very low in the absence  
119 of sugar and with monosaccharides. On the contrary, with disaccharides, viability was  
120 between 19 and 45%, which was an adequate range for screening either less or more resistant  
121 mutants. Lactose 50 g/L was selected because it corresponds to the composition of milk, thus

122 a condition often encountered by *L. paracasei* in the natural and technological environments  
123 of cheese-making, for example. The whole strategy followed in this work is illustrated in  
124 figure 1. A screening method composed of easy and rapid steps to save time and reduce the  
125 risk of bias was developed. The viability of the 1287 mutants after 24-h desiccation followed  
126 by rapid rehydration was evaluated in 96-well microplates by monitoring the acidification  
127 kinetics (due to sugar metabolism) using a medium containing a pH indicator. Absorbance  
128 ( $A_{420\text{nm}}$ ) was correlated to the quantity of metabolically active (or viable) bacteria, thus the  
129 viability of the mutants could be compared to that of the WT ( $A_{420\text{nm}}$  (7 h) =  $1.91 \pm 0.08$ ).  
130 Sensitive and resistant mutants were subsequently validated by individual drying on PP  
131 coupons and by determining viability by the plate count method in order to remove possible  
132 false positive mutants (for instance, metabolic deficiency mutants).

133 **Identification of genes involved in resistance to pronounced desiccation followed by**  
134 **rapid rehydration.**

135 The mutant library was subjected to 24-h desiccation (pronounced desiccation) followed by  
136 rapid rehydration. Screening of the 1287 transposon mutants resulted in the detection of 47  
137 sensitive mutants ( $A_{420\text{nm}}$  at 7 h < 1.75 for 2 biological replicates) but no resistant mutants  
138 ( $A_{420\text{nm}}$  at 7 h > 2.07 for 2 biological replicates). After the validation step by individual drying  
139 of the 47 mutants, 24 mutants displayed a significant decrease of survival compared to the  
140 WT ( $p < 0.05$ ) (Table 2). Identified genes were mostly involved in transport, regulation and  
141 membrane binding proteins. Moreover, five sensitive mutants containing transposon in a gene  
142 encoding a hypothetical protein were identified (LSEI\_0040, LSEI\_0733, LSEI\_0806,  
143 LSEI\_1045 and LSEI\_1316). Mutants were classified into three categories according to their  
144 viability: + (mean viability at least 1.2-fold less), ++ (mean viability at least 2-fold less) and  
145 +++ (mean viability at least 3-fold less than WT). The majority of mutants (20) were  
146 categorized as +. The two most sensitive mutants (+++) were disrupted for a putative

147 ribonucleotide diphosphate reductase (LSEI\_1468) and for a hypothetical protein (LSEI\_  
148 1316). Two mutants disrupted for a putative PTS (LSEI\_0178) and for a putative alpha/beta  
149 fold family hydrolase (LSEI\_0756) were categorized as ++. Fifteen genes out of the 24  
150 belonged to putative operons (Table 3). Eleven genes were specific to *L. paracasei* or related  
151 species, five to *Lactobacillus* genus and eight were well conserved among Gram (+) bacteria.  
152 Two genes among the five encoding hypothetical proteins presented a transmembrane domain  
153 (LSEI\_0040 and LSEI\_1045). All hypothetical protein genes, except LSEI\_0733, were  
154 specific to the *L. paracasei* group.

### 155 **Analysis of mutant sensitivity after pronounced desiccation followed by progressive** 156 **rehydration**

157 To assess if the identified genes were involved during dehydration whatever the rehydration  
158 process, the WT and the 24 sensitive mutants identified previously were subjected to  
159 desiccation for 24-h followed by progressive rehydration (for 2 h) instead of rapid  
160 rehydration. In these conditions, the viability of the WT was  $99 \pm 3\%$ , which is considerably  
161 higher than obtained with a rapid rehydration. Among the 24 sensitive mutants identified  
162 previously, only seven were also sensitive after desiccation and progressive rehydration  
163 (Table 4). They encode a putative diadenosine tetraphosphatase (LSEI\_0167), a PTS system  
164 (LSEI\_0178), an NAD (FAD)-dependent dehydrogenase (LSEI\_0397), a cation transport  
165 ATPase (LSEI\_0749), a ribonucleotide reductase (LSEI\_1468), a SAICAR synthase  
166 (LSEI\_1754) and a hypothetical protein (LSEI\_0040). As observed for desiccation and rapid  
167 rehydration, the most sensitive mutant was ribonucleotide diphosphate reductase.

### 168 **Transcriptomic analysis of the identified genes during a desiccation – rehydration cycle**

169 Mutant library screening allowed the identification of 24 genes involved in the global  
170 perturbation which consisted in desiccation followed by rehydration. Thus, it was not possible  
171 to determine during which phase these genes were involved since rehydration was necessary

172 to analyze mutant phenotypes. To determine the chronology of the genetic mechanisms during  
173 humidity fluctuations, transcriptomic analysis of the identified genes was carried out on the  
174 WT. RNA extractions were performed at two different stages of desiccation: partial  
175 desiccation D1 (76% of water evaporated after 1 h) and pronounced desiccation D2 (96% of  
176 water evaporated after 2 h) which corresponded to completely dried cells (Figure 2). As  
177 rehydration kinetics is decisive for bacterial survival, rapid and progressive rehydration were  
178 applied for RNA extractions after 2 h.

179 As lactose was required to ensure good survival of bacteria during the desiccation/rehydration  
180 process it was reasonable to expect that some candidate genes could be differentially  
181 expressed in the presence of lactose. However, for the 24 genes, expressions after 15-min  
182 incubation in lactose were comparable to that after a 15-min phosphate buffer incubation  
183 (Figure 3). Differentially expressed genes were classified to obtain the most upregulated  
184 (Table 5, values in dark red) and downregulated (Table 5, values in dark blue) genes, with a  
185 mean expression value higher or lower than 2.0. Among the 24 genes studied, 18 were  
186 differentially expressed ( $p < 0.05$ ) for at least one condition (Table 5). The six genes involved  
187 in hydric changes but not differentially expressed encoded a putative PTS transporter  
188 (LSEI\_0178), a reductase (LSEI\_0758), a ppGpp alormone (LSEI\_1539), a DNA polymerase  
189 (LSEI\_1709) and hypothetical proteins (LSEI\_0733 and LSEI\_1045). Six genes were  
190 upregulated for all the hydric fluctuations tested. These genes encoded a putative diadenosine  
191 tetraphosphatase (LSEI\_0167), a polysaccharide transporter (LSEI\_0238), a pyridoxine 5'-  
192 phosphate oxidase (LSEI\_0363), a PTS transporter (LSEI\_A05) and hypothetical proteins  
193 (LSEI\_0040 and LSEI\_0806). Also, LSEI\_0397 encoding a putative NAD dependent  
194 dehydrogenase was upregulated during desiccation and progressive rehydration. Conversely,  
195 LSEI\_0749 encoding a putative cation transport ATPase was upregulated during desiccation  
196 and rapid rehydration. Interestingly, these genes were the most upregulated ( $> 2$ -fold change)



197 for at least one condition. LSEI\_A05 (putative lactose specific PTS system) was the most  
198 upregulated gene during desiccation (D1 and D2). One gene, LSEI\_1754, encoding a putative  
199 SAICAR synthase was the most downregulated gene in these experiments (mean expression  
200 value < 2.0 for all the drying and rehydration conditions).

201 Three genes, LSEI\_0934 (a putative DNA binding response regulator), LSEI\_2505 (a putative  
202 phosphate starvation inducible protein) and LSEI\_2725 (a putative sorbitol operon  
203 transcription regulator) were upregulated after only 2 h of desiccation and represent potential  
204 dry state biomarkers. LSEI\_1316 encoding a putative hypothetical protein was upregulated  
205 after 1 h and 2 h of desiccation. Interestingly, no gene was specifically upregulated during  
206 subsequent rehydration. Conversely, five genes were downregulated specifically during  
207 rehydration: LSEI\_0756 (a putative hydrolase) LSEI\_1009 (a putative spermidine/putrescine-  
208 binding protein), LSEI\_1468 (a putative ribonucleotide reductase), LSEI\_1324 (a putative  
209 membrane metal-binding protein) and LSEI\_1659 (a putative glucokinase).

210

## 211 **Discussion**

212 Twenty-four desiccation-sensitive mutants were identified from the *L. paracasei* mutant  
213 library screening after desiccation followed by rapid rehydration. Contrary to our recent  
214 screening of this library for mild stress sensitivity (33), no mutants for putative promoters  
215 were identified as sensitive to desiccation. Half of the identified genes were specific of the *L.*  
216 *casei/paracasei/rhamnosus* group. On the contrary, eight genes were well conserved among  
217 Gram-positive bacteria. Interestingly, these genes, although present in *Listeria monocytogenes*  
218 genome, were not identified by the screening of *L. monocytogenes* random mutants for  
219 desiccation resistance (Hingston et al., 2015). Otherwise, this study of *L. monocytogenes*  
220 desiccation resistance shows the involvement of a gene encoding a putative glutathione  
221 peroxidase, known to prevent oxidative damages. This gene is present in the *L. paracasei*

222 mutant library but was not identified as sensitive. These differences may result from the  
223 drying conditions applied such as the surface used for desiccation, the relative humidity, the  
224 drying medium or the rehydration conditions.

## 225 **Metabolism and transport**

226 Three transporters are required for survival to hydric fluctuation including two putative  
227 phosphotransferase systems (LSEI\_0178 and LSEI\_A05) and one cation transporter  
228 (LSEI\_0749). Whereas the function of LSEI\_0178 is obvious, the LSEI\_A05 function as a  
229 lactose transporter is uncertain because the corresponding operon is plasmidic and incomplete  
230 in this strain. However, this strain is able to metabolize lactose, suggesting that this sugar can  
231 enter the cell via another transporter (37). Several authors have reported a link between PTS  
232 systems and stress response for *Lactobacillus* genus. *L. plantarum* mutants with an impaired  
233 expression of the mannose PTS operon exhibited increased sensitivity to peroxide, probably  
234 due to a diminution of glucose capture and energy production (38).

235 Next, we identified a membrane associated protein (LSEI\_1009) predicted to bind polyamines  
236 before their transport into the cell by the ABC transporters encoded by other genes of the  
237 LSEI\_1005-1009 operon. Polyamines have various important physiological roles during stress  
238 response, including the modulation of gene expression, signal transduction, oxidative defense  
239 mechanism, and cell-to-cell communication (39, 40).

240 One identified gene encoded a glucokinase (LSEI\_1659), a key enzyme of glucose  
241 metabolism. In *S. aureus*, glucokinase is also involved in pathogenicity (biofilm formation,  
242 virulence factors, cell wall synthesis) (41). In our case, glucokinase as well as PTS  
243 interruption could lead to energy diminution and then sensitivity to hydric fluctuations.  
244 Another gene, LSEI\_0363, encodes a putative enzyme that catalyzes the oxidation of  
245 pyridoxamine-5-P (PMP) and pyridoxine-5-P (PNP) to pyridoxal-5-P (PLP) in the vitamin B6

246 pathway. Vitamin B6, an antioxidant molecule, has been implicated in defense against cellular  
247 oxidative stress in *Saccharomyces cerevisiae* (42).

## 248 **Cell wall function and structure**

249 Modification at the cell wall level appears to be essential for surviving hydric fluctuation,  
250 considering the 6 genes related to the cell wall and identified as essential for hydric  
251 fluctuation survival. The gene LSEI\_0238 encodes a polysaccharide transporter involved in  
252 the export of lipoteichoic acid (LTA), a major constituent of the Gram-positive cell wall (24).  
253 Interestingly, this gene was also needed for *L. paracasei* gut establishment (29). The mutant  
254 for LSEI\_2546, another polysaccharide transporter involved in LTA export, was not identified  
255 as sensitive.

256 LSEI\_2505 encodes a putative membrane protein involved in response to phosphate  
257 starvation. Although the regulation of this family of genes has been deciphered in *Bacillus*  
258 *subtilis*, their exact role remains unclear (43). Then, LSEI\_1324 encodes a putative  
259 membrane metal binding protein. Finally, three hypothetical proteins exhibited a  
260 transmembrane domain (LSEI\_0040, LSEI\_0806 and LSEI\_1316). Interestingly LSEI\_0040  
261 was involved in the adaptation of *L. paracasei* to thermal, ethanol and oxidative stresses (33)  
262 and LSEI\_0806 to oxidative stress. Both the latter gene and LSEI\_1316 were also required for  
263 gut establishment (29). The present and previous results show that membrane proteins are  
264 important for *L. paracasei* adaptation to various environments and involved in general stress  
265 response.

## 266 **Regulation of stress response**

267 Two genes involved in alarmone synthesis or degradation are needed for *L. paracasei* survival  
268 during hydric fluctuations. Alarmones are putative chemical messengers produced during  
269 environmental changes. LSEI\_0167 encodes a putative diadenosine tetraphosphatase, an

270 enzyme that hydrolyzes diadenosine tetraphosphate (Ap4A) into two molecules of adenosine  
271 diphosphate (ADP). Ap4A has been reported to be involved in heat stress response in *E.coli*  
272 (44). Moreover *apaH* (diadenosine tetraphosphatase) mutation causes Ap4A accumulation  
273 and sensitivity to thermal stress (45). Nevertheless, Despotović and collaborators wondered  
274 whether Ap4A was an alarmone or a damage metabolite because they observed that no  
275 signaling cascade was triggered by Ap4A and that its accumulation at high level was toxic for  
276 *E. coli*.(46). The second gene (LSEI\_1539, *relA*) encoded a putative ppGpp synthetase. The  
277 second ppGpp synthetase (LSEI\_0901, RelQ) was not present in the mutant library. ppGpp  
278 functions as a chemical messenger for metabolism, growth, stress tolerance and virulence in  
279 bacteria (47). It is well known that ppGpp interacts with RNA polymerase to affect gene  
280 repression or induction. Broadbent et al., (2010) suggested that ppGpp is a signal for acid  
281 tolerance response in *L. paracasei*. The LSEI\_1539 mutant was also necessary for gut  
282 establishment (29).

283 LSEI\_2725 (*gutR*) has been identified as a determinant for surviving hydric fluctuations.  
284 Although it is annotated as a sorbitol operon transcription regulator, its predicted function  
285 should be reconsidered. Alcantara *et al.*, 2008 reported that in *L. paracasei* ATCC334, *gutR* is  
286 split into 3 ORFs (LSEI\_2728, LSEI\_2726 and LSEI\_2725) as the result of transposition  
287 events, and consequently this strain is unable to use sorbitol, contrary to *L. casei* BL23. In  
288 addition, the LSEI\_2724 (*gutM*) gene, encoding a sorbitol operon activator with *gutR*, is  
289 dispensable for desiccation resistance. In conclusion, we assume that LSEI\_2725 functions as  
290 a regulator but independently of the sorbitol operon.

## 291 **DNA related enzymes**

292 It was widely reported that desiccation induces DNA damage (1, 50). Indeed, the mutant  
293 library screening identified two genes involved in nucleotide metabolism, LSEI\_1468 (a  
294 ribonucleotide reductase, RNR) and LSEI\_1754 (a SAICAR synthase). The RNR mutant was

295 particularly sensitive (mean viability 10-fold less than WT). RNR is an essential enzyme since  
296 its mediates the synthesis of deoxyribonucleotides, the precursors of DNA synthesis (51), and  
297 we have previously reported that the RNR gene was involved in general response to mild  
298 stresses in *L. paracasei* (33). SAICAR synthase is involved in de novo purine biosynthesis  
299 (52). These two genes could be involved in DNA repair. Recently, García-Fontana *et al.*  
300 (2016) reported that the DNA molecule was overproduced and acted as a protein protector in  
301 desiccation tolerant bacteria. This phenomenon could occur in *L. paracasei*. This assumption  
302 is supported by the identification of a mutant in a DNA polymerase gene (LSEI\_1709).

303

#### 304 **Environment sensing**

305 A DNA binding response regulator (RR, LSEI\_0934) was required for *L. paracasei* survival  
306 of desiccation. LSEI\_0934 forms a two-component system (TCS) with histidine kinase (HK,  
307 LSEI\_0935). The involvement of TCS in *Lactobacillus* response to acid and bile stresses has  
308 been reported (54, 55) and the *L. paracasei* ATCC334 genome contains 17 putative TCS  
309 (56). LSEI\_0934-0935 TCS is organized in a putative operon with five genes encoding  
310 phosphate ABC transporters, probably involved in phosphate assimilation. Intracellular poly-  
311 P accumulation synthesized from Pi by polyphosphate kinase (Ppk) is a characteristic of some  
312 *Lactobacillus* strains to adapt to stress (57). This could be the case during desiccation stress in  
313 combination with the phosphate starvation protein gene (LSEI\_2505). This assumption should  
314 be modulated because mutants for the HK (LSEI\_0935) and a phosphate ABC transporter  
315 permease (LSEI\_0938) are available in the library but were not identified as sensitive to  
316 hydric fluctuations.

#### 317 **Taking into account desiccation and rehydration kinetics**

318 The results indicate that rapid rehydration of WT strain cells was more detrimental than  
319 progressive rehydration. It has been reported that progressive rehydration could reduce the  
320 stress applied to bacteria as it promotes membrane integrity recovery (58, 59). We found only  
321 seven sensitive mutants whatever their rehydration kinetics (Table 4).

322 Among the genes essential for survival, five genes were expressed at the same level as the  
323 control whatever the hydration phase (Table 5). This result again shows the strength of global  
324 reverse genetics, since some genes may be essential for a function, although expressed  
325 constitutively. Four transcriptomic profiles were observed during hydric fluctuations (Table  
326 5): seven genes were upregulated during both desiccation and rehydration, four genes were  
327 upregulated only during the desiccation stage, one gene was downregulated during both  
328 desiccation and rehydration, five genes were downregulated only during the rehydration stage.  
329 We assume that adaption to hydric fluctuations occurs during dehydration and continues or  
330 not during rehydration.

331 In conclusion, this work identified 24 genetic determinants for the resistance of *L. paracasei*  
332 to desiccation. Transcriptomic analysis of the corresponding genes highlighted that seven  
333 genes were upregulated during both desiccation and rehydration and four during desiccation  
334 only. This analysis provides clues for developing genetic biomarkers to monitor the intensity  
335 of desiccation. These findings provide novel insights into the genetic mechanisms involved in  
336 desiccation and rehydration adaptation in *L. paracasei*.

337

## 338 **Materials and Methods**

339 **Strains and growth conditions.** Wild-type (WT) *L. paracasei* ATCC 334 (CIP 107868,  
340 Institut Pasteur Collection) and its corresponding mutants obtained by random transposon  
341 insertion mutagenesis (31) were grown statically at 37°C in MRS (Difco). 5 µg/mL

342 erythromycin (Em) was used to select mutants. The mutants correspond to the 1287 genic and  
343 intergenic mutants already described (33) (29). For each mutant, the putative inactivated  
344 function was assigned thanks to the genome annotation of this strain (24). The mutant library  
345 was grown in 96-well plates (200  $\mu$ l) for 48 h. Plates were mixed (30 s, 700 rpm, Eppendorf  
346 MixMate) and 10  $\mu$ L of each well was used to inoculate 190  $\mu$ L of MRS in new 96-well  
347 plates. Individual mutants were grown in tubes for 48h (2 ml) and vortexed to inoculate at a  
348 dilution of 1/100 in new tubes. Plates and tubes were incubated for 24h at 37°C to obtain cells  
349 in stationary phase (concentration between  $1.0 \times 10^9$  and  $2.0 \times 10^9$  UFC/mL). Cells were  
350 rehydrated with bromocresol purple (BCP) medium which contains 5 g/L of tryptone, peptic  
351 peptone, yeast extract and sodium acetate, 2 g/L of ammonium citrate and dipotassium  
352 phosphate, 1g/L of glucose, 1 ml of tween 80, 0.20 g/L of magnesium sulfate, 0.17 g/L of  
353 bromocresol purple and 0.05 g/L of manganese sulfate.

354 **Drying conditions.** The drying chambers were hermetic plastic boxes (20 cm  $\times$  13 cm  $\times$  6  
355 cm) containing 100 mL saturated potassium acetate (Sigma–Aldrich) solution to obtain 25%  
356 RH at 25°C. Samples were placed on a rack in the drying chamber to keep them above the salt  
357 solution and the atmosphere was maintained using a ventilator (Sunon, Radiospare, France).  
358 Temperature and RH were controlled using an EASY Log USB tool (Lascar Electronics).  
359 Drying was performed in a U bottom 96-well microplate (Evergreen, untreated) for mutant  
360 library screening and on sterile polypropylene (PP) coupon of 15 mm  $\times$  10 mm  $\times$  2 mm  
361 (Scientix, Fougères, France) for individual treatments. Drying solutions with or without  
362 protector were used and as a function of the experiments.

363 **Screening of the mutant library for viability after desiccation.** Stationary growth phase  
364 cultures were mixed (1 min, 1000 rpm) and 50  $\mu$ L of cells were spotted in a U bottom 96-well  
365 microplate and centrifuged (5 min, 4000g, 25°C). Pellets were suspended with 50  $\mu$ L of 50

366 g/L lactose (1 min, 1700 rpm) and incubated 15 min at 20°C. Then, only 10 µL of suspension  
367 were placed in each well and the plates were placed in the ventilated chamber. After 24 h,  
368 each well was rehydrated rapidly with 110 µL of (BCP) medium at 37°C. This dedicated  
369 culture medium with pH indicator turns to yellow when bacteria metabolize sugars after  
370 rehydration. Absorbance at 420 nm ( $A_{420nm}$ ) was measured in a plate reader for 7h at 37°C  
371 (Paradigm, Beckman Coulter). Mutants were considered as potentially sensitive when  
372 absorbance at 7 h was lower than 1.75, which is the mean value of the WT minus twice the  
373 standard derivation, for the two biological replicates. Mutants were selected as potentially  
374 resistant when absorbance at 7h ( $A_{7h}$ ) was higher than 2.07, which is the mean value of the  
375 WT plus twice the standard derivation, for two biological replicates. Mutant phenotypes were  
376 confirmed, determining viability on plate counts (3 biological replicates).

377 **Determination of the viability of selected mutants after progressive and rapid**  
378 **rehydration.** *L. paracasei* cultures in stationary phase (1 mL) were centrifuged (5 min, 4000  
379 g, 25°C) and pellets were suspended by vortexing with one volume of drying solution  
380 composed of lactose 50 g/L. After incubation for 15 min, 10 µL of cell suspensions were  
381 placed onto a sterile polypropylene (PP) coupon of 15 mm × 10 mm × 2 mm (Scientix,  
382 Fougères, France). Three coupons were prepared for each mutant. The inoculated coupons  
383 were placed in the ventilated chamber in plastic petri dishes. For rapid rehydration, 110 µL of  
384 BCP medium was deposited on the dried cells and the latter were resuspended by 15  
385 successive cycles using a micropipette. For progressive rehydration, dried cells were  
386 introduced into a hermetic chamber at 99% RH for 2 h at 25°C. Then, 110 µL of BCP  
387 medium was deposited on the wet bacteria cells that were recovered by 15 successive cycles  
388 using a micropipette. Colony enumeration by plate counts was averaged and the viability  
389 percentage was obtained with the ratio of colony enumeration (in CFU/coupon) before  
390 desiccation to that after desiccation. Mutants exhibiting a viability percentage significantly



391 lower (or higher) than the WT were determined as sensitive (or resistant) (Student test,  $p <$   
392 0.05).

393 **Bioinformatics.** The putative operon organization of corresponding genes was established  
394 using the Biocyc website. Then, genes were aligned using BLAST  
395 (<https://blast.ncbi.nlm.nih.gov/Blast.cgi>) against all bacteria to determine their specificity.

396 **RT-qPCR.** Cells in mid-exponential growth phase ( $OD_{600}$  between 0.5 and 0.6) were  
397 centrifuged and concentrated to an  $OD_{600}$  of 20. Cell pellets were suspended with phosphate  
398 buffer (10 mM pH 6.5) supplemented with 50 g/L lactose except for control. The suspension  
399 was incubated for 15 min at 25°C and 1 mL was deposited on a 0.22  $\mu$ m polyvinylidene  
400 membrane in a glass Petri dish to prevent cell adhesion. Cells were dried in ventilated  
401 chambers for 2 h and then subjected to either rapid or progressive rehydration. Rehydrated  
402 cells were subsequently detached from the membrane using a cell lifter. Total RNA isolation,  
403 cDNA synthesis and qPCR were performed as previously described (60) using TRI Reagent  
404 (Sigma Aldrich), DNase I (Roche), iScript™ Reverse Transcription Supermix (Bio-Rad) and  
405 SsoAdvanced™ Universal SYBR® Green Supermix (Bio-Rad). Primers were designed by  
406 using Primer3Plus (61) (Table 6). Quantitative PCR were performed using a CFX96 Touch™  
407 Real-Time PCR Detection System (Bio-Rad) in triplicate, in a 20  $\mu$ L-reaction mixture.  $C_q$   
408 (threshold value) calculation was determined by a regression model of the CFX Manager™  
409 Software. The relative transcript levels of genes were calculated using the  $2^{-\Delta\Delta CT}$  method (62).  
410 In order to select appropriate reference genes, 10 potential housekeeping genes (*fusA*, *ileS*,  
411 *lepA*, *leuS*, *mutL*, *pcrA*, *pyrG*, *recA*, *recG* and *rpoB*) (63) were tested with all the experimental  
412 conditions and analyzed using the CFX Manager™ Software. The genes *fusA*, *lepA* and *rpoB*  
413 were selected as the references because they displayed the lowest  $M$  values (0.22) and

414 coefficients of variation (0.09), meaning that they have the most stable expression in the  
415 tested conditions.

416

### 417 **Conflict of Interest Statement**

418 The authors declare that the research was conducted in the absence of any commercial or  
419 financial relationships that could be construed as a potential conflict of interest.

420

### 421 **Author Contributions**

422 Study conception and design: AP, HL, LB and JFC. Acquisition of data: AP. Analysis and  
423 interpretation of data: AP, HL, LB and JFC. Drafting of manuscript: AP. Critical revision:  
424 AP, HL, LB and JFC. All authors read and approved the final manuscript.

425

### 426 **Acknowledgments**

427 This work was funded by the Regional Council of Bourgogne Franche-Comté and the Fonds  
428 Européen de DEveloppement Régional (FEDER). AP was supported by a PhD fellowship  
429 from the Ministère de l'Enseignement Supérieur, de la Recherche et de l'Innovation  
430 (MESRI). We thank the other members of the laboratory for their assistance, including, in  
431 particular, Christine Rojas for her skillful technical assistance. We thank the Pasteur Institute  
432 Microorganism Collection for the *L. paracasei* strain (CIP 107868).

433

### 434 **References**

435 1. Potts M. 1994. Desiccation tolerance of prokaryotes. *Microbiol Rev* 58:755–805.

- 436 2. Dupont S, Rapoport A, Gervais P, Beney L. 2014. Survival kit of *Saccharomyces*  
437 *cerevisiae* for anhydrobiosis. *Appl Microbiol Biotechnol* 98:8821–8834.
- 438 3. França MB, Panek AD, Eleutherio ECA. 2007. Oxidative stress and its effects during  
439 dehydration. *Comp Biochem Physiol A Mol Integr Physiol* 146:621–631.
- 440 4. Mille Y, Beney L, Gervais P. 2003. Magnitude and kinetics of rehydration influence the  
441 viability of dehydrated *E. coli* K-12. *Biotechnol Bioeng* 83:578–582.
- 442 5. Billi D, Potts M. 2002. Life and death of dried prokaryotes. *Res Microbiol* 153:7–12.
- 443 6. Esbelin J, Santos T, Hébraud M. 2018. Desiccation: An environmental and food industry  
444 stress that bacteria commonly face. *Food Microbiol* 69:82–88.
- 445 7. Pointing SB, Belnap J. 2012. Microbial colonization and controls in dryland systems.  
446 *Nat Rev Microbiol* 10:551–562.
- 447 8. Crowe JH, Carpenter JF, Crowe LM. 1998. The Role of Vitrification in Anhydrobiosis.  
448 *Annu Rev Physiol* 60:73–103.
- 449 9. Potts M. 1999. Mechanisms of desiccation tolerance in cyanobacteria. *Eur J Phycol*  
450 34:319–328.
- 451 10. Crowe JH. 2014. Anhydrobiosis: an unsolved problem. *Plant Cell Environ* 37:1491–  
452 1493.
- 453 11. Wełnicz W, Grohme MA, Kaczmarek Ł, Schill RO, Frohme M. 2011. Anhydrobiosis in  
454 tardigrades—The last decade. *J Insect Physiol* 57:577–583.

- 455 12. Deng X, Li Z, Zhang W. 2012. Transcriptome sequencing of *Salmonella enterica*  
456 serovar Enteritidis under desiccation and starvation stress in peanut oil. *Food Microbiol*  
457 30:311–315.
- 458 13. Finn S, Händler K, Condell O, Colgan A, Cooney S, McClure P, Amézquita A, Hinton  
459 JCD, Fanning S. 2013. ProP Is Required for the Survival of Desiccated *Salmonella*  
460 *enterica* Serovar Typhimurium Cells on a Stainless Steel Surface. *Appl Environ*  
461 *Microbiol* 79:4376–4384.
- 462 14. Gruzdev N, McClelland M, Porwollik S, Ofaim S, Pinto R, Saldinger-Sela S. 2012.  
463 Global Transcriptional Analysis of Dehydrated *Salmonella enterica* Serovar  
464 Typhimurium. *Appl Environ Microbiol* 78:7866–7875.
- 465 15. Li H, Bhaskara A, Megalis C, Tortorello ML. 2012. Transcriptomic Analysis of  
466 *Salmonella* Desiccation Resistance. *Foodborne Pathog Dis* 9:1143–1151.
- 467 16. Maserati A, Fink RC, Lourenco A, Julius ML, Diez-Gonzalez F. 2017. General response  
468 of *Salmonella enterica* serovar Typhimurium to desiccation: A new role for the  
469 virulence factors *sopD* and *sseD* in survival. *PloS One* 12:e0187692.
- 470 17. Chen Z, Jiang X. 2017. Thermal Resistance and Gene Expression of both Desiccation-  
471 Adapted and Rehydrated *Salmonella enterica* Serovar Typhimurium Cells in Aged  
472 Broiler Litter. *Appl Environ Microbiol* 83.
- 473 18. Cytryn EJ, Sangurdekar DP, Streeter JG, Franck WL, Chang W -s., Stacey G, Emerich  
474 DW, Joshi T, Xu D, Sadowsky MJ. 2007. Transcriptional and Physiological Responses  
475 of *Bradyrhizobium japonicum* to Desiccation-Induced Stress. *J Bacteriol* 189:6751–  
476 6762.

- 477 19. Higo A, Suzuki T, Ikeuchi M, Ohmori M. 2007. Dynamic transcriptional changes in  
478 response to rehydration in *Anabaena* sp. PCC 7120. *Microbiology* 153:3685–3694.
- 479 20. LeBlanc JC, Goncalves ER, Mohn WW. 2008. Global Response to Desiccation Stress in  
480 the Soil Actinomycete *Rhodococcus jostii* RHA1. *Appl Environ Microbiol* 74:2627–  
481 2636.
- 482 21. Hingston PA, Piercey MJ, Hansen LT. 2015. Insertional mutagenesis reveals genes  
483 associated with desiccation and osmotic stress in *Listeria monocytogenes*. *Appl Environ*  
484 *Microbiol* AEM.01134-15.
- 485 22. Mandal RK, Kwon YM. 2017. Global Screening of *Salmonella enterica* Serovar  
486 Typhimurium Genes for Desiccation Survival. *Front Microbiol* 8.
- 487 23. Maserati A, Lourenco A, Diez-Gonzalez F, Fink RC. 2018. iTRAQ-Based Global  
488 Proteomic Analysis of *Salmonella enterica* Serovar Typhimurium in Response to  
489 Desiccation, Low Water Activity, and Thermal Treatment. *Appl Environ Microbiol* 84.
- 490 24. Cai H, Thompson R, Budinich MF, Broadbent JR, Steele JL. 2010. Genome Sequence  
491 and Comparative Genome Analysis of *Lactobacillus casei*: Insights into Their Niche-  
492 Associated Evolution. *Genome Biol Evol* 1:239–257.
- 493 25. Douillard FP, Ribbera A, Jarvinen HM, Kant R, Pietila TE, Randazzo C, Paulin L, Laine  
494 PK, Caggia C, von Ossowski I, Reunanen J, Satokari R, Salminen S, Palva A, de Vos  
495 WM. 2013. Comparative Genomic and Functional Analysis of *Lactobacillus casei* and  
496 *Lactobacillus rhamnosus* Strains Marketed as Probiotics. *Appl Environ Microbiol*  
497 79:1923–1933.

- 498 26. Duar RM, Lin XB, Zheng J, Martino ME, Grenier T, Pérez-Muñoz ME, Leulier F,  
499 Gänzle M, Walter J. 2017. Lifestyles in transition: evolution and natural history of the  
500 genus *Lactobacillus*. *FEMS Microbiol Rev* 41:S27–S48.
- 501 27. Hosseini Nezhad M, Hussain MA, Britz ML. 2015. Stress Responses in Probiotic  
502 *Lactobacillus casei*. *Crit Rev Food Sci Nutr* 55:740–749.
- 503 28. Santivarangkna C, Kulozik U, Foerst P. 2007. Alternative Drying Processes for the  
504 Industrial Preservation of Lactic Acid Starter Cultures. *Biotechnol Prog* 23:302–315.
- 505 29. Licandro-Seraut H, Scornec H, Pédrón T, Cavin J-F, Sansonetti PJ. 2014. Functional  
506 genomics of *Lactobacillus casei* establishment in the gut. *Proc Natl Acad Sci*  
507 111:E3101–E3109.
- 508 30. Scornec H, Tichit M, Bouchier C, Pédrón T, Cavin J-F, Sansonetti PJ, Licandro-Seraut  
509 H. 2014. Rapid 96-well plates DNA extraction and sequencing procedures to identify  
510 genome-wide transposon insertion sites in a difficult to lyse bacterium: *Lactobacillus*  
511 *casei*. *J Microbiol Methods* 106:78–82.
- 512 31. Licandro-Seraut H, Brinster S, Guchte M van de, Scornec H, Maguin E, Sansonetti P,  
513 Cavin J-F, Serror P. 2012. Development of an Efficient In Vivo System (Pjunc-  
514 TpnaseIS1223) for Random Transposon Mutagenesis of *Lactobacillus casei*. *Appl*  
515 *Environ Microbiol* 78:5417–5423.
- 516 32. Perpetuini G, Scornec H, Tofalo R, Serror P, Schirone M, Suzzi G, Corsetti A, Cavin JF,  
517 Licandro-Seraut H. 2013. Identification of Critical Genes for Growth in Olive Brine by  
518 Transposon Mutagenesis of *Lactobacillus pentosus* C11. *Appl Environ Microbiol*  
519 79:4568–4575.

- 520 33. Palud A, Scornec H, Cavin J-F, Licandro H. 2018. New Genes Involved in Mild Stress  
521 Response Identified by Transposon Mutagenesis in *Lactobacillus paracasei*. Front  
522 Microbiol 9.
- 523 34. Carvalho AS, Silva J, Ho P, Teixeira P, Malcata FX, Gibbs P. 2004. Relevant factors for  
524 the preparation of freeze-dried lactic acid bacteria. Int Dairy J 14:835–847.
- 525 35. Costa E, Usall J, Teixidó N, Garcia N, Viñas I. 2000. Effect of protective agents,  
526 rehydration media and initial cell concentration on viability of *Pantoea agglomerans*  
527 strain CPA-2 subjected to freeze-drying. J Appl Microbiol 89:793–800.
- 528 36. Jofré A, Aymerich T, Garriga M. 2015. Impact of different cryoprotectants on the  
529 survival of freeze-dried *Lactobacillus rhamnosus* and *Lactobacillus casei/paracasei*  
530 during long-term storage. Benef Microbes 6:381–386.
- 531 37. Monedero V, Mazé A, Boël G, Zúñiga M, Beauflis S, Hartke A, Deutscher J. 2007. The  
532 Phosphotransferase System of *Lactobacillus casei*: Regulation of Carbon Metabolism  
533 and Connection to Cold Shock Response. J Mol Microbiol Biotechnol 12:20–32.
- 534 38. Stevens MJA, Molenaar D, de Jong A, de Vos WM, Kleerebezem M. 2010. Involvement  
535 of the Mannose Phosphotransferase System of *Lactobacillus plantarum* WCFS1 in  
536 Peroxide Stress Tolerance. Appl Environ Microbiol 76:3748–3752.
- 537 39. Miller-Fleming L, Olin-Sandoval V, Campbell K, Ralser M. 2015. Remaining Mysteries  
538 of Molecular Biology: The Role of Polyamines in the Cell. J Mol Biol 427:3389–3406.
- 539 40. Shah P, Swiatlo E. 2008. A multifaceted role for polyamines in bacterial pathogens. Mol  
540 Microbiol 68:4–16.

- 541 41. Kumar PS, Kumar YN, Prasad UV, Yeswanth S, Swarupa V, Vasu D, Venkatesh K,  
542 Srikanth L, Rao VK, Sarma PVGK. 2014. Comparative Structural and Functional  
543 Analysis of *Staphylococcus aureus* Glucokinase with other Bacterial Glucokinases.  
544 Indian J Pharm Sci 76:430–436.
- 545 42. Chumnantana R, Yokochi N, Yagi T. 2005. Vitamin B6 compounds prevent the death of  
546 yeast cells due to menadione, a reactive oxygen generator. Biochim Biophys Acta BBA -  
547 Gen Subj 1722:84–91.
- 548 43. Antelmann H, Scharf C, Hecker M. 2000. Phosphate Starvation-Inducible Proteins of  
549 *Bacillus subtilis*: Proteomics and Transcriptional Analysis. J Bacteriol 182:4478–4490.
- 550 44. Lee PC, Bochner BR, Ames BN. 1983. AppppA, heat-shock stress, and cell oxidation.  
551 Proc Natl Acad Sci 80:7496–7500.
- 552 45. Johnstone DB, Farr SB. 1991. AppppA binds to several proteins in *Escherichia coli*,  
553 including the heat shock and oxidative stress proteins DnaK, GroEL, E89, C45 and C40.  
554 EMBO J 10:3897–3904.
- 555 46. Despotović D, Brandis A, Savidor A, Levin Y, Fumagalli L, Tawfik DS. 2017.  
556 Diadenosine tetraphosphate (Ap<sub>4</sub>A) – an *E. coli* alarmone or a damage metabolite?  
557 FEBS J 284:2194–2215.
- 558 47. Beljantseva J, Kudrin P, Jimmy S, Ehn M, Pohl R, Varik V, Tozawa Y, Shingler V,  
559 Tenson T, Rejman D, Haurlyliuk V. 2017. Molecular mutagenesis of ppGpp: turning a  
560 RelA activator into an inhibitor. Sci Rep 7:41839.
- 561 48. Broadbent JR, Larsen RL, Deibel V, Steele JL. 2010. Physiological and Transcriptional  
562 Response of *Lactobacillus casei* ATCC 334 to Acid Stress. J Bacteriol 192:2445–2458.



- 563 49. Alcantara C, Sarmiento-Rubiano LA, Monedero V, Deutscher J, Perez-Martinez G,  
564 Yebra MJ. 2008. Regulation of *Lactobacillus casei* Sorbitol Utilization Genes Requires  
565 DNA-Binding Transcriptional Activator GutR and the Conserved Protein GutM. Appl  
566 Environ Microbiol 74:5731–5740.
- 567 50. Fredrickson JK, Shu-mei WL, Gaidamakova EK, Matrosova VY, Zhai M, Sulloway  
568 HM, Scholten JC, Brown MG, Balkwill DL, Daly MJ. 2008. Protein oxidation: key to  
569 bacterial desiccation resistance? ISME J 2:393–403.
- 570 51. Torrents E. 2014. Ribonucleotide reductases: essential enzymes for bacterial life. Front  
571 Cell Infect Microbiol 4.
- 572 52. Nelson SW, Binkowski DJ, Honzatko RB, Fromm HJ. 2005. Mechanism of Action of  
573 *Escherichia coli* Phosphoribosylaminoimidazolesuccinocarboxamide Synthetase †.  
574 Biochemistry 44:766–774.
- 575 53. García-Fontana C, Narváez-Reinaldo JJ, Castillo F, González-López J, Luque I,  
576 Manzanera M. 2016. A New Physiological Role for the DNA Molecule as a Protector  
577 against Drying Stress in Desiccation-Tolerant Microorganisms. Front Microbiol 7.
- 578 54. Cui Y, Liu W, Qu X, Chen Z, Zhang X, Liu T, Zhang L. 2012. A two component system  
579 is involved in acid adaptation of *Lactobacillus delbrueckii* subsp. bulgaricus. Microbiol  
580 Res 167:253–261.
- 581 55. Pfeiler EA, Azcarate-Peril MA, Klaenhammer TR. 2007. Characterization of a Novel  
582 Bile-Inducible Operon Encoding a Two-Component Regulatory System in *Lactobacillus*  
583 *acidophilus*. J Bacteriol 189:4624–4634.

- 584 56. Alcántara C, Revilla-Guarinos A, Zúñiga M. 2011. Influence of Two-Component Signal  
585 Transduction Systems of *Lactobacillus casei* BL23 on Tolerance to Stress Conditions.  
586 Appl Environ Microbiol 77:1516–1519.
- 587 57. Alcántara C, Blasco A, Zúñiga M, Monedero V. 2014. Accumulation of Polyphosphate  
588 in *Lactobacillus* spp. and Its Involvement in Stress Resistance. Appl Environ Microbiol  
589 80:1650–1659.
- 590 58. Lang E, Iaconelli C, Zoz F, Guyot S, Alvarez-Martin P, Beney L, Perrier-Cornet J-M,  
591 Gervais P. 2017. Drying parameters greatly affect the destruction of *Cronobacter*  
592 *sakazakii* and *Salmonella Typhimurium* in standard buffer and milk. Food Microbiol  
593 62:82–91.
- 594 59. Zoz F, Iaconelli C, Lang E, Iddir H, Guyot S, Grandvalet C, Gervais P, Beney L. 2016.  
595 Control of Relative Air Humidity as a Potential Means to Improve Hygiene on Surfaces:  
596 A Preliminary Approach with *Listeria monocytogenes*. PLoS ONE 11.
- 597 60. Licandro-Seraut H, Gury J, Tran NP, Barthelmebs L, Cavin J-F. 2008. Kinetics and  
598 Intensity of the Expression of Genes Involved in the Stress Response Tightly Induced by  
599 Phenolic Acids in *Lactobacillus plantarum*. J Mol Microbiol Biotechnol 14:41–47.
- 600 61. Untergasser A, Nijveen H, Rao X, Bisseling T, Geurts R, Leunissen JAM. 2007.  
601 Primer3Plus, an enhanced web interface to Primer3. Nucleic Acids Res 35:W71–W74.
- 602 62. Livak KJ, Schmittgen TD. 2001. Analysis of Relative Gene Expression Data Using  
603 Real-Time Quantitative PCR and the  $2^{-\Delta\Delta CT}$  Method. Methods 25:402–408.
- 604 63. Landete JM, Garcia-Haro L, Blasco A, Manzanares P, Berbegal C, Monedero V, Zuniga  
605 M. 2010. Requirement of the *Lactobacillus casei* MaeKR Two-Component System for

606 L-Malic Acid Utilization via a Malic Enzyme Pathway. *Appl Environ Microbiol* 76:84–

607 95.

608

609

610 **Tables**

611 **Table 1. *L. paracasei* ATCC 334 viability after a pronounced desiccation period followed**  
612 **by rapid rehydration with or without saccharides used as protectors.**

| <b>Condition of drying</b>     | <b>Concentration (g/L)</b> | <b>Viability percentage after desiccation/rehydration</b> |
|--------------------------------|----------------------------|-----------------------------------------------------------|
| No protector (distilled water) |                            | 0.001 ± 0.000                                             |
| <b>Monosaccharides</b>         |                            |                                                           |
| Glucose                        | 25                         | 0.13 ± 0.09                                               |
|                                | 50                         | 0.01 ± 0.01                                               |
| Fructose                       | 25                         | 0.01 ± 0.01                                               |
|                                | 50                         | 0.04 ± 0.02                                               |
| Galactose                      | 25                         | 0.05 ± 0.02                                               |
|                                | 50                         | 0.09 ± 0.04                                               |
| <b>Disaccharides</b>           |                            |                                                           |
| Lactose                        | 25                         | 21 ± 2                                                    |
|                                | 50                         | 35 ± 7                                                    |
| Trehalose                      | 25                         | 41 ± 9                                                    |
|                                | 50                         | 19 ± 7                                                    |
| Sucrose                        | 25                         | 27 ± 9                                                    |
|                                | 50                         | 45 ± 0                                                    |

613 Bacterial cells in stationary growth phase suspended in various protective solutions were air  
614 dried for 24 h at 25% RH and 25°C on PP coupons. Survival was determined after suspending  
615 dried cells in BCP medium. Viability was measured by plate count (CFU/ml).

616

617

618

619

620

621

622

623 **Table 2. Table 2. *L. paracasei* mutants sensitive to a pronounced desiccation period**  
 624 **followed by rapid rehydration and their corresponding  $A_{420nm}$  at 7h and viability**  
 625 **percentage.**

| <b>Disrupted gene</b> | <b>Predictive function</b>             | <b><math>A_{420nm}</math> at 7 h<br/>2 repetitions</b> | <b>Viability %<br/>3 repetitions</b> | <b>Sensitivity level</b> |
|-----------------------|----------------------------------------|--------------------------------------------------------|--------------------------------------|--------------------------|
| <b>WT</b>             |                                        | <b>1.91 ± 0.08</b>                                     | <b>41 ± 2</b>                        |                          |
| LSEI_0040             | Hypothetical protein                   | 1.56 / 1.69                                            | 23 ± 4                               | +                        |
| LSEI_0167             | Diadenosine tetraphosphatase           | 1.71 / 1.64                                            | 23 ± 3                               | +                        |
| LSEI_0178             | PTS                                    | 1.73 / 1.59                                            | 18 ± 9                               | ++                       |
| LSEI_0238             | PST transporter                        | 1.63 / 1.66                                            | 23 ± 7                               | +                        |
| LSEI_0363             | Pyridoxine 5'-phosphate oxidase        | 1.74 / 1.75                                            | 26 ± 6                               | +                        |
| LSEI_0397             | NAD (FAD)-dependent dehydrogenase      | 1.34 / 1.40                                            | 25 ± 5                               | +                        |
| LSEI_0733             | Hypothetical protein                   | 1.74 / 1.75                                            | 31 ± 5                               | +                        |
| LSEI_0749             | Cation transport ATPase                | 1.74 / 1.75                                            | 23 ± 3                               | +                        |
| LSEI_0756             | Alpha/beta fold family hydrolase       | 1.62 / 1.75                                            | 18 ± 1                               | ++                       |
| LSEI_0758             | Aldo/keto reductase related enzyme     | 1.45 / 1.48                                            | 22 ± 3                               | +                        |
| LSEI_0806             | Hypothetical protein                   | 1.46 / 1.59                                            | 29 ± 3                               | +                        |
| LSEI_0934             | DNA-binding response regulator         | 1.48 / 1.59                                            | 28 ± 4                               | +                        |
| LSEI_1009             | Spermidine/putrescine-binding protein  | 1.63 / 1.45                                            | 26 ± 1                               | +                        |
| LSEI_1045             | Hypothetical protein                   | 1.72 / 1.69                                            | 23 ± 4                               | +                        |
| LSEI_1316             | Hypothetical protein                   | 1.30 / 1.27                                            | 14 ± 6                               | +++                      |
| LSEI_1324             | Membrane metal-binding protein         | 1.70 / 1.63                                            | 33 ± 3                               | +                        |
| LSEI_1468             | Ribonucleotide diphosphate reductase   | 1.10 / 1.11                                            | 4 ± 1                                | +++                      |
| LSEI_1539             | ppGpp                                  | 1.35 / 1.56                                            | 29 ± 5                               | +                        |
| LSEI_1659             | Glucokinase                            | 1.65 / 1.66                                            | 25 ± 8                               | +                        |
| LSEI_1709             | DNA polymerase I                       | 1.65 / 1.60                                            | 28 ± 6                               | +                        |
| LSEI_1754             | SAICAR synthase                        | 1.75 / 1.46                                            | 23 ± 4                               | +                        |
| LSEI_2505             | Phosphate-starvation-inducible protein | 1.71 / 1.75                                            | 32 ± 3                               | +                        |
| LSEI_2725             | Sorbitol transcription regulator       | 1.74 / 1.70                                            | 27 ± 5                               | +                        |
| LSEI_A05              | PTS cellobiose-specific                | 1.59 / 1.44                                            | 31 ± 2                               | +                        |

626 Cells in stationary growth phase were air dried for 24 h at 25% RH and 25°C with 50 g/L  
 627 lactose solution in microplates or on PP coupons. Survival was determined by monitoring  
 628  $A_{420nm}$  of dried cells suspended in BCP medium. Mutants were classified into three  
 629 categories according to their viability: + (mean viability at least 1.2-fold less), ++ (mean  
 630 viability at least 2-fold less) and +++ (mean viability at least 3-fold less than WT).

631 **Table 3. Operon organization and specificity of the 24 genes involved in adaptation to**  
 632 **pronounced desiccation followed by rapid rehydration.**

| Gene      | Predictive function                    | Putative operon | DNA strand | Specificity                        |
|-----------|----------------------------------------|-----------------|------------|------------------------------------|
| LSEI_0040 | Hypothetical protein                   | No              | (+)        | <i>L.casei/paracasei/rhamnosus</i> |
| LSEI_0167 | Diadenosine tetraphosphatase           | No              | (-)        | <i>L.casei/paracasei/rhamnosus</i> |
| LSEI_0178 | PTS                                    | 0178-0180       | (+)        | <i>L.casei/paracasei/rhamnosus</i> |
| LSEI_0238 | PST transporter                        | 0238-0240       | (+)        | <i>L.casei/paracasei/rhamnosus</i> |
| LSEI_0363 | Pyridoxine 5'-phosphate oxidase        | No              | (-)        | <i>Lactobacillus</i>               |
| LSEI_0397 | NAD (FAD)- dehydrogenase               | No              | (-)        | <i>Lactobacillus</i>               |
| LSEI_0733 | Hypothetical protein                   | 0731-0733       | (-)        | Gram +                             |
| LSEI_0749 | Cation transport ATPase                | No              | (-)        | <i>Lactobacillus</i>               |
| LSEI_0756 | Alpha/beta fold family hydrolase       | No              | (+)        | <i>Lactobacillus</i>               |
| LSEI_0758 | Aldo/keto reductase related enzyme     | 0757-0758       | (-)        | Gram +                             |
| LSEI_0806 | Hypothetical protein                   | 0805-0806       | (+)        | <i>L.casei/paracasei/rhamnosus</i> |
| LSEI_0934 | DNA-binding response regulator         | 0933-0941       | (+)        | <i>Lactobacillus</i>               |
| LSEI_1009 | Spermidine/putrescine-binding protein  | 1005-1009       | (+)        | Gram +                             |
| LSEI_1045 | Hypothetical protein                   | No              | (-)        | <i>L.casei/paracasei/rhamnosus</i> |
| LSEI_1316 | Hypothetical protein                   | 1314-1319       | (+)        | <i>L.casei/paracasei/rhamnosus</i> |
| LSEI_1324 | Membrane metal-binding protein         | 1320-1326       | (+)        | <i>L.casei/paracasei/rhamnosus</i> |
| LSEI_1468 | Ribonucleotide reductase               | 1467-1470       | (+)        | Gram +                             |
| LSEI_1539 | ppGpp synthase                         | 1537-1539       | (-)        | Gram +                             |
| LSEI_1659 | Glucokinase                            | 1658-1661       | (-)        | Gram +                             |
| LSEI_1709 | DNA polymerase                         | 1704-1709       | (-)        | Gram +                             |
| LSEI_1754 | SAICAR synthase                        | 1746-1756       | (-)        | Gram +                             |
| LSEI_2505 | Phosphate-starvation-inducible protein | No              | (+)        | <i>L.casei/paracasei/rhamnosus</i> |
| LSEI_2725 | Sorbitol transcription regulator       | 2720-2726       | (-)        | <i>L.casei/paracasei/rhamnosus</i> |
| LSEI_A05  | PTS                                    | A04-A06         | (-)        | <i>L.casei/paracasei/rhamnosus</i> |

633

634

635

636 **Table 4. *L. paracasei* mutants sensitive to pronounced desiccation followed by**  
637 **progressive rehydration and their corresponding viability percentage among mutants**  
638 **identified as sensitive to pronounced desiccation followed by rapid rehydration.**

| Disrupted gene | Predictive function                  | Viability %<br>3 repetitions |
|----------------|--------------------------------------|------------------------------|
| WT             |                                      | 99 ± 3                       |
| LSEI_0040      | Hypothetical protein                 | 86 ± 7                       |
| LSEI_0167      | Diadenosine tetrphosphatase          | 60 ± 0                       |
| LSEI_0178      | PTS                                  | 82 ± 7                       |
| LSEI_0397      | NAD (FAD)-dependent dehydrogenase    | 41 ± 6                       |
| LSEI_0749      | Cation transport ATPase              | 57 ± 4                       |
| LSEI_1468      | Ribonucleotide diphosphate reductase | 14 ± 2                       |
| LSEI_1754      | SAICAR synthase                      | 87 ± 8                       |

639 Cells in stationary growth phase were air dried for 24 h at 25% RH and 25°C with 50 g/L  
640 lactose solution on PP coupons. Progressive rehydration was performed in a closed chamber  
641 with RH adjusted at 99% for 2 h and the addition of water to obtain the mass before drying.  
642 Viability percentages were determined by suspending dried cells with BCP medium.

643

644

645

646

647

648

649

650

651

652

653 **Table 5. Relative transcript level of *L. paracasei* genes after desiccation (1 h and 2 h) and**  
 654 **rehydration (rapid or progressive) for the 24 genes identified after library mutant**  
 655 **screening.**

| Gene                                           | Fonction                                | LAC        | D1          | D2          | RR          | PR          |
|------------------------------------------------|-----------------------------------------|------------|-------------|-------------|-------------|-------------|
| LSEI_0040                                      | Hypothetical protein                    | 1.0 ± 0.1  | 1.7 ± 0.6*  | 2.6 ± 0.3*  | 2.1 ± 0.2*  | 1.9 ± 0.4   |
| LSEI_0167                                      | Diadenosine tetraphosphatase            | 1.0 ± 0.1  | 1.8 ± 0.4*  | 2.3 ± 0.3*  | 1.6 ± 0.2   | 2.1 ± 0.4*  |
| LSEI_0178                                      | PTS                                     | 1.0 ± 0.2  | -1.1 ± 0.2  | -1.1 ± 0.1  | -1.3 ± 0.2  | -1.3 ± 0.3  |
| LSEI_0238                                      | PST family polysaccharide transporter   | 1.0 ± 0.1  | 1.3 ± 0.5*  | 2.2 ± 0.3*  | 1.6 ± 0.1*  | 1.9 ± 0.3*  |
| LSEI_0363                                      | Pyridoxine 5'-phosphate oxidase         | 1.0 ± 0.1  | 1.4 ± 0.4*  | 1.9 ± 0.2*  | 1.6 ± 0.2*  | 1.9 ± 0.3*  |
| LSEI_0397                                      | NAD(FAD)-dependent dehydrogenase        | 1.0 ± 0.2  | 1.6 ± 0.4*  | 1.8 ± 0.2*  | 1.7 ± 0.2*  | -1.3 ± 0.2  |
| LSEI_0733                                      | Hypothetical protein                    | 1.1 ± 0.1  | -1.1 ± 0.2  | 1.3 ± 0.2   | 1.1 ± 0.1   | 1.2 ± 0.3   |
| LSEI_0749                                      | Cation transport ATPase                 | 1.1 ± 0.1  | 2.1 ± 0.2*  | 2.1 ± 0.2*  | 1.3 ± 0.3   | 1.6 ± 0.1*  |
| LSEI_0756                                      | Alpha/beta fold family hydrolase        | 1.0 ± 0.2  | 1.2 ± 0.1   | 1.1 ± 0.1   | -1.4 ± 0.2* | -1.7 ± 0.3* |
| LSEI_0758                                      | Aldo/keto reductase                     | -1.1 ± 0.2 | -1.4 ± 0.4  | -1.1 ± 0.1  | -1.1 ± 0.1  | 1.0 ± 0.2   |
| LSEI_0806                                      | Hypothetical protein                    | -1.1 ± 0.1 | 1.7 ± 0.5*  | 2.3 ± 0.3*  | 2.0 ± 0.2*  | 2.4 ± 0.4*  |
| LSEI_0934                                      | DNA-binding response regulator          | -1.1 ± 0.1 | 1.2 ± 0.2   | 1.6 ± 0.2*  | 1.2 ± 0.1   | 1.4 ± 0.2   |
| LSEI_1009                                      | Spermidine/putrescine-binding protein   | -1.1 ± 0.1 | -1.3 ± 0.2  | -1.4 ± 0.1  | -2.0 ± 0.4* | -2.0 ± 0.4* |
| LSEI_1045                                      | Hypothetical protein                    | -1.1 ± 0.1 | 1.2 ± 0.1   | 1.2 ± 0.2   | -1.3 ± 0.2  | -1.4 ± 0.2  |
| LSEI_1316                                      | Hypothetical protein                    | -1.1 ± 0.1 | 1.7 ± 0.2*  | 1.6 ± 0.2*  | 1.0 ± 0.1   | -1.1 ± 0.2  |
| LSEI_1324                                      | Membrane metal-binding protein          | -1.1 ± 0.1 | -1.4 ± 0.2  | -1.3 ± 0.1  | -1.4 ± 0.2* | -1.3 ± 0.2  |
| LSEI_1468                                      | Ribonucleotide diphosphate reductase    | 1.0 ± 0.2  | 1.5 ± 0.1   | 1.2 ± 0.1   | -1.3 ± 0.2* | -1.7 ± 0.3* |
| LSEI_1539                                      | ppGpp synthase                          | 1.0 ± 0.1  | -1.3 ± 0.2  | -1.1 ± 0.1  | -1.1 ± 0.1  | -1.3 ± 0.3  |
| LSEI_1659                                      | Glucokinase                             | 1.1 ± 0.1  | -1.4 ± 0.4  | -1.3 ± 0.2  | -1.4 ± 0.2* | -1.4 ± 0.2  |
| LSEI_1709                                      | DNA polymerase                          | 1.0 ± 0.2  | 1.0 ± 0.3   | 1.2 ± 0.2   | 1.2 ± 0.1   | 1.3 ± 0.3   |
| LSEI_1754                                      | SAICAR synthase                         | -1.1 ± 0.1 | -2.5 ± 0.6* | -2.5 ± 0.6* | -2.5 ± 0.6* | -2.5 ± 0.6* |
| LSEI_2505                                      | Phosphate-starvation-inducible protein  | -1.1 ± 0.1 | -1.1 ± 0.4  | 1.8 ± 0.2*  | 1.2 ± 0.2   | 1.1 ± 0.3   |
| LSEI_2725                                      | Sorbitol operon transcription regulator | -1.1 ± 0.1 | 1.3 ± 0.3   | 1.5 ± 0.2*  | 1.2 ± 0.1   | 1.4 ± 0.3   |
| LSEI_A05                                       | PTS                                     | 1.0 ± 0.1  | 3.5 ± 0.2*  | 4.1 ± 0.2*  | 2.3 ± 0.1*  | 2.1 ± 0.3*  |
| <b>Total of genes differentially expressed</b> |                                         | <b>0</b>   | <b>10</b>   | <b>13</b>   | <b>13</b>   | <b>11</b>   |



656 LAC (cells incubated 15 min with lactose), D1 (cells dehydrated for 1 h), D2 (cells  
657 dehydrated for 2 h), RR (rapid rehydration with 1 mL of distilled water), PR (progressive  
658 rehydration in a closed chamber with RH adjusted at 99% for 2 h). RTL were calculated using  
659  $2^{-\Delta\Delta C_t}$  method. For the phosphate buffer control condition, a gene expression value of 1.0 was  
660 attributed and RTL of genes in stress condition were calculated as a function of this value.  
661 Positive values (> 1.0) represent upregulation and negative values (< 1.0) represent  
662 downregulation. \*, significant changes in gene expression ( $p < 0.05$ ) compared to the  
663 phosphate buffer condition (4 biological replicates). Values in light red correspond to  
664 upregulation and in dark red to upregulations > 2.0; values in light blue correspond to  
665 downregulation and in dark blue to down regulation < -2.0.

666

667

668

669

670

671

672

673

674

675

676

677

678

679

680

681

682

683

684

685

686

687

688

689 **Table 6. Primers designed for RT-qPCR.**

| Primers | Sequence (5' → 3')     | Primers | Sequence (5' → 3')      |
|---------|------------------------|---------|-------------------------|
| 0040-F  | CCACAAATGAGTCAAACCATCT | 0040-R  | GGTCGTTATCGCACCTAATGA   |
| 0167-F  | ATGCCGACTGCTGTTGAGTT   | 0167-R  | CGGACCCACATTCGATTA      |
| 0178-F  | TAGGCAACATTCGCAGTCAA   | 0178-R  | ATAATCGGCAACGGCTTTC     |
| 0238-F  | CGGATCGCTTCCCTTATTCT   | 0238-R  | CCAACATCTGTGAGCCAGAC    |
| 0363-F  | GGTCCCAAGGGTTCACTACA   | 0363-R  | GCCAAATGGTTGTTGAGAG     |
| 0397-F  | GGCAGCAGCAGGATTAT      | 0397-R  | CCACGCATCAAGAAGACATT    |
| 0733-F  | AATTGCTGGCTGGCAGTATC   | 0733-R  | GTTTGAAATCCCGGTCGTAA    |
| 0749-F  | ATGACTGGTGACGGTGTGAA   | 0749-R  | AACGAAATCCGCAATAGAGC    |
| 0756-F  | CACTGACAGCCACGATCAAA   | 0756-R  | CTTGCTGCCGTGAATAAACA    |
| 0758-F  | TGATTCAGGCACAACGATTT   | 0758-R  | GCGTCACGTCGGTTTCTTTA    |
| 0806-F  | GCTAGTGCCTTAGCCACCAC   | 0806-R  | CGATCTGCCAAGTCTTCAGA    |
| 0934-F  | GCCTAGAAGCTCGGAGCAGAT  | 0934-R  | GTTTGCGGCTGACTCTGACT    |
| 1009-F  | CAGGTGAAGCCAGTGAGATG   | 1009-R  | CCGTCTTAGGGATGACCAAGT   |
| 1045-F  | CAATACACAGACCGCCAGTG   | 1045-R  | ATCGTTGGCTTTGTCGTCTT    |
| 1316-F  | CGCCGCATGAAGTATGTTTA   | 1316-R  | GAGGGCTCAACACGTTTAACA   |
| 1324-F  | CCACTTGGTGCTGGATTGT    | 1324-R  | AATAAGTCAAGCCCGCTGAA    |
| 1468-F  | CAATGGTTCGTGCTTTGACTT  | 1468-R  | TGCTGTGAGCCTGGTGATTA    |
| 1539-F  | ACAAACATCAGCAGCCACAA   | 1539-R  | CATGCAACACTTCGCAAGAT    |
| 1659-F  | TGGATGAAGGCAGTCACATC   | 1659-R  | CCCATACCGATACCGACAAA    |
| 1709-F  | CAAGTGCCAGAAGACGATAAG  | 1709-R  | TCCAAATCACCAGTCAAATCAG  |
| 1754-F  | CCGCCAATCCACGAATACTA   | 1754-R  | GCACTTGCTTGAGTTGTTTTCAG |
| 2505-F  | TGCTGGTTCGCTACATTGAG   | 2505-R  | ACGAGCAGTTGGCGTAAGAT    |
| 2725-F  | CAGATCGACCATTGACACACA  | 2725-R  | GCCGATGCCCTTACCTTAGT    |
| A05-F   | TTCTGGTTCTGTGGTGTCCA   | A05-R   | ATGTTGCCCTGCCTGATA      |
| fusA-F  | CCTGAAACTGGCGAAACATT   | fusA-R  | CCAACCTTAGCAGCAACCTT    |
| ileS-F  | GCAACGGTTGACTCTTCCTC   | ileS-R  | GCTACCATAAACCGCATCGT    |
| lepA-F  | AAGAGCAGCACGAAGGGATA   | lepA-R  | AGGATCGCCATTAAGCAAGA    |
| leuS-F  | GCTGGATGCTGGTATTGCTT   | leuS-R  | ATCACGCAGTTTGCCTTCAT    |
| mutL-F  | CCTGCCAGTGTTGTCAAAGA   | mutL-R  | CGTTATCGCTAACCCGAATC    |
| pcrA-F  | GCAACACAAGCGTTGAGAAG   | pcrA-R  | ACCAGCAATCGGACTGAGTT    |
| pyrG-F  | GAAGCGTGATGTTGGTTTCG   | pyrG-R  | TGTGCTGAGTTGGTTTCGTC    |
| recA-F  | TTGGCAACCGATAAAGACAA   | recA-R  | TGAGATGCGTTGACAAGTCC    |
| recG-F  | CGTAGCGTGATTCTGGTGAC   | recG-R  | TTCCAAAGATTGCTGCTTCA    |
| rpoB-F  | AATACAAGGCAGCCATGAC    | rpoB-R  | ATCCAAGGCACCATCTTCAC    |

690

691

692 **Figure legends**

693 **Figure 1. Organizational chart of the strategy developed in this work to identify genetic**  
694 **determinants of *L. paracasei* resistance to desiccation and rehydration.** PPC,  
695 polypropylene coupons.

696 **Figure 2. Evolution of the cell suspension mass during desiccation (orange curve) and**  
697 **rehydration (blue curve) on a polyvinylidene membrane.** Sampling times for RNA  
698 extractions are represented by the grey boxes: LAC (1 mL of cells incubated 15 min with  
699 lactose before drying), D1 (cells dried 1 h, partial desiccation), D2 (cells dried 2 h,  
700 pronounced desiccation), RR (rapid rehydration with 1 mL of distilled water), PR  
701 (progressive rehydration in a closed chamber with RH adjusted at 99% for 2 h and addition of  
702 water to obtain the mass before drying).

703 **Figure 3. Schematic representation of genes differentially expressed in *L. paracasei***  
704 **during desiccation and rehydration.** Gene expressions are represented by color boxes in  
705 light red for upregulation, dark red for upregulations > 2.0, light blue for downregulation,  
706 dark blue for downregulation < -2.0 and in white for constitutive regulation. For each gene,  
707 boxes from left to right correspond to: lactose incubation (LT), desiccation for 1h (D1),  
708 desiccation for 2h (D2), rapid rehydration (RR) and progressive rehydration (PR).

**Mutant Library – 1287 mutants**  
(1110 genic mutants + 177 intergenic mutants)

**24 h air drying in 96 well plates**  
25 % RH – 25°C – lactose 50 g/L

**Absorbance at 420 nm in 96 well plates**  
Rehydration with BCP medium – 37°C

**Sensitive mutants**  
 $A_{420}$  at 7h < 0.75  
(2 biological replicates)

**WT absorbance**  
 $A_{420}$  at 7h  
=  $0.91 \pm 0.08$

**Resistant mutants**  
 $A_{420}$  at 7h > 1.07  
(2 biological replicates)

**Validation of mutants on PPC**  
Percentage viability ( $p < 0.05$ )  
(3 biological replicates)

**WT survival on PPC**  
Percentage survival  
=  $41 \pm 2 \%$

**Validation of mutants on PPC**  
Percentage viability ( $p < 0.05$ )  
(3 biological replicates)

**Identification of genes**  
Involved in dehydration and rehydration phases

**WT**  
RNA extraction in the different phases

**RT-qPCR**  
Expression of genes in the different phases

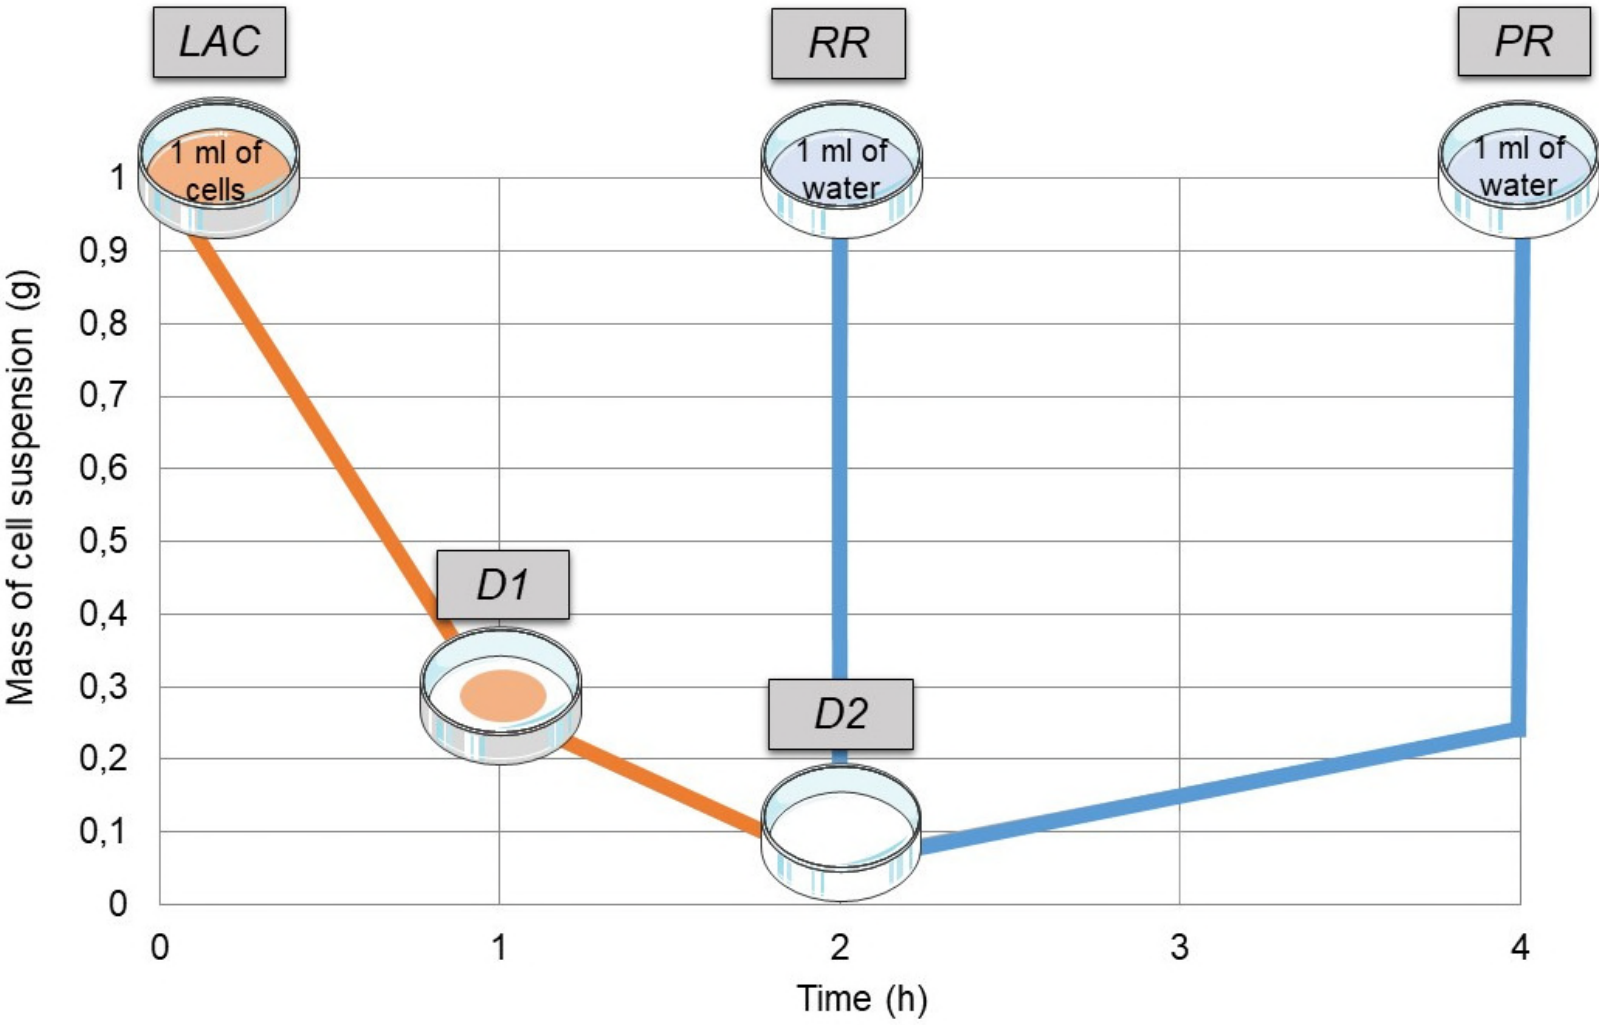

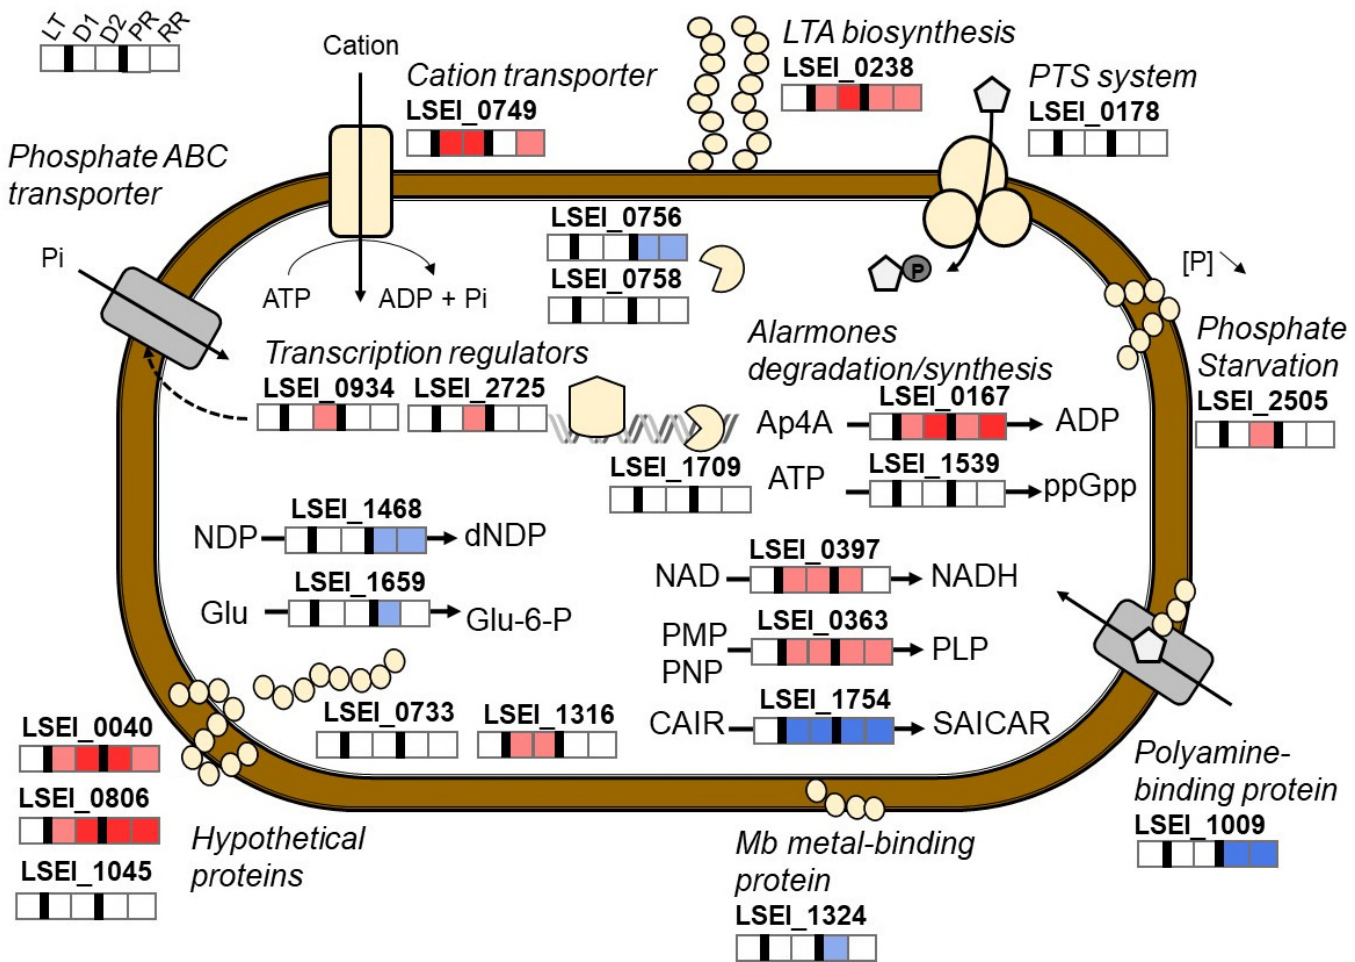

Source: https://www.biorxiv.org/content/10.1101/475830v1.full.pdf
